# Supplementary material for: Azolo[1,5-a]pyrimidines and Their Condensed Analogs with Anticoagulant Activity
Source: Preprints.org preprint supplement (doi:10.20944/preprints202112.0090.v1), 2021-12-06
Supplement: Supplementary file 1 [file supplementary]

**Supporting Information**

**AZOLO[1,5-a]PYRIMIDINES AND THEIR CONDENSED ANALOGS WITH ANTICOAGULANT ACTIVITY**

*Konstantin V. Savateev*[a], Victor V. Fedotov[a], Vladimir L. Rusinov[a], Svetlana K. Kotovskaya[a], Alexandr A. Spasov[b], Aida F. Kucheryavenko[b], Pavel M. Vasiliev[b], Vadim A. Kosolapov[b], Victor S. Sirotenko[b], Kseniya A. Gaidukova[b], Georgiy M. Uskov[b]*

*[a] Department of organic and biomolecular chemistry, Ural Federal University named after the First President of Russia B.N. Eltsin, Mira st. 19, Yekaterinburg, 620002, Russian Federation; E-mail: i-krafttt@yandex.ru*

*[b] Department of Pharmacology and Bioinformatics, Volgograd State Medical University, Pavshikh Bortsov Sq. 1, Volgograd, 400131, Russian Federation*

**Table of contents**

[**Spectra of compounds** 2](#_Toc88645262)

# **Spectra of compounds**

**2,6-Diethoxycarbonyl-1,2,4-triazolo[1,5-*a*]pyrimidin-7-one (3а)**

**DMSO**

**DMSO**

**Figure S1**. 1H NMR (400 MHz, DMSO-*d*6) and 13C NMR (100 MHz, DMSO-*d*6) spectra of **3a**

**2,6-Diethoxycarbonyl-1,2,4-triazolo[1,5-*a*]pyrimidin-7-one (3а)**

**Figure S2**. IR spectra of **3a**

**2-(Thien-2-yl)-6-ethoxycarbonyl-1,2,4-triazolo[1,5-*a*]pyrimidin-7-one (3f)**

**DMSO**

**DMSO**

**Figure S3**. 1H NMR (400 MHz, DMSO-*d*6) and 13C NMR (100 MHz, DMSO-*d*6) spectra of **3f**

**2-(Thien-2-yl)-6-ethoxycarbonyl-1,2,4-triazolo[1,5-*a*]pyrimidin-7-one (3f)**

**Figure S4**. IR spectra of **3f**

**2-(Pyridin-3-yl)-6-nitro-1,2,4-triazolo[1,5-*a*]pyrimidin-7-one (3g)**

**H2O**

**DMSO**

**DMSO**

**Figure S5**. 1H NMR (400 MHz, DMSO-*d*6) and 13C NMR (100 MHz, DMSO-*d*6) spectra of **3g**

**2-(Pyridin-3-yl)-6-nitro-1,2,4-triazolo[1,5-*a*]pyrimidin-7-one (3g)**

**Figure S6**. IR spectra of **3g**

**2-phenyl-6-nitro-1,2,4-triazolo[1,5-*a*]pyrimidin-7-one pyridinium (3h)**

**DMSO**

**DMSO**

**Figure S7**. 1H NMR (400 MHz, DMSO-*d*6) and 13C NMR (100 MHz, DMSO-*d*6) spectra of **3h**

**2-phenyl-6-nitro-1,2,4-triazolo[1,5-*a*]pyrimidin-7-one pyridinium (3h)**

**Figure S8**. IR spectra of **3h**

**2-(fur-2-yl)-6-nitro-1,2,4-triazolo[1,5-*a*]pyrimidin-7-one pyridinium (3i)**

**DMSO**

**Figure S9**. 1H NMR (400 MHz, DMSO-*d*6) and 13C NMR (100 MHz, DMSO-*d*6) spectra of **3i**

**DMSO**

**2-(fur-2-yl)-6-nitro-1,2,4-triazolo[1,5-*a*]pyrimidin-7-one pyridinium (3i)**

**Figure S10**. IR spectra of **3i**

**2-(thien-2-yl)-6-nitro-1,2,4-triazolo[1,5-*a*]pyrimidin-7-one pyridinium (3j)**

**DMSO**

**DMSO**

**Figure S11**. 1H NMR (400 MHz, DMSO-*d*6) and 13C NMR (100 MHz, DMSO-*d*6) spectra of **3j**

**2-(thien-2-yl)-6-nitro-1,2,4-triazolo[1,5-*a*]pyrimidin-7-one pyridinium (3j)**

**Figure S12**. IR spectra of **3j**

**2-(5-nitrofur-2-yl)-6-nitro-1,2,4-triazolo[1,5-*a*]pyrimidin-7-one pyridinium (3k)**

**DMSO**

**DMSO**

**Figure S13**. 1H NMR (400 MHz, DMSO-*d*6) and 13C NMR (100 MHz, DMSO-*d*6) spectra of **3k**

**2-(5-nitrofur-2-yl)-6-nitro-1,2,4-triazolo[1,5-*a*]pyrimidin-7-one pyridinium (3k)**


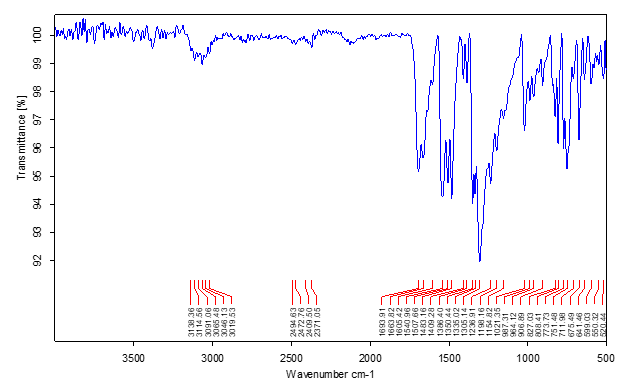


**Figure S14**. IR spectra of **3k**

**2-phenyl-3-cyano-6-nitropyrazolo[1,5-*a*]pyrimidin-7-one pyridinium (3l)**

**DMSO**

**DMSO**

**Figure S15**. 1H NMR (400 MHz, DMSO-*d*6) and 13C NMR (100 MHz, DMSO-*d*6) spectra of **3l**

**2-phenyl-3-cyano-6-nitropyrazolo[1,5-*a*]pyrimidin-7-one pyridinium (3l)**

**Figure S16**. IR spectra of **3l**

**2-(5-nitrofur-2-yl)-5-methyl-6-nitro-1,2,4-triazolo[1,5-*a*]pyrimidin-7-one (3m)**

**DMSO**

**DMSO**

**Figure S17**. 1H NMR (400 MHz, DMSO-*d*6) and 13C NMR (100 MHz, DMSO-*d*6) spectra of **3m**

**2-(5-nitrofur-2-yl)-5-methyl-6-nitro-1,2,4-triazolo[1,5-*a*]pyrimidin-7-one (3m)**

**
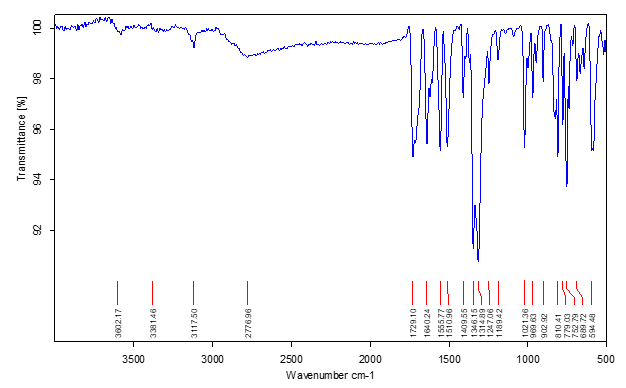
**

**Figure S18**. IR spectra of **3m**

**2-(fur-2-yl)-6-nitro-1,2,4-triazolo[1,5-*a*]pyrimidin-7-one sodium salt (3n)**

**H2O**

**DMSO**

**DMSO**

**Figure S19**. 1H NMR (400 MHz, DMSO-*d*6) and 13C NMR (100 MHz, DMSO-*d*6) spectra of **3n**

**2-(fur-2-yl)-6-nitro-1,2,4-triazolo[1,5-*a*]pyrimidin-7-one sodium salt (3n)**


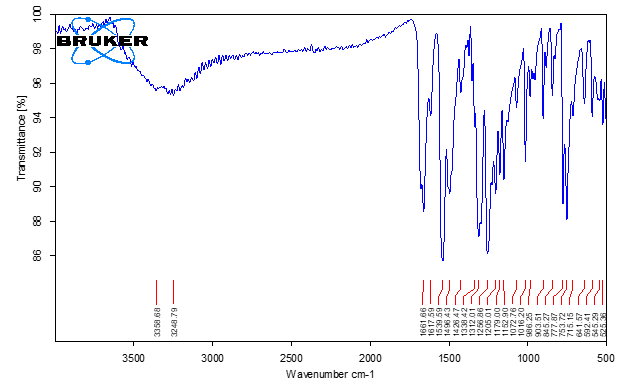


**Figure S20**. IR spectra of **3n**

**2-(fur-2-yl)-6-nitro-1,2,4-triazolo[1,5-*a*]pyrimidin-7-one ammonium salt (3o)**

**DMSO**

**H2O**

**DMSO**

**Figure S21**. 1H NMR (400 MHz, DMSO-*d*6) and 13C NMR (100 MHz, DMSO-*d*6) spectra of **3o**

**2-(fur-2-yl)-6-nitro-1,2,4-triazolo[1,5-*a*]pyrimidin-7-one ammonium salt (3o)**


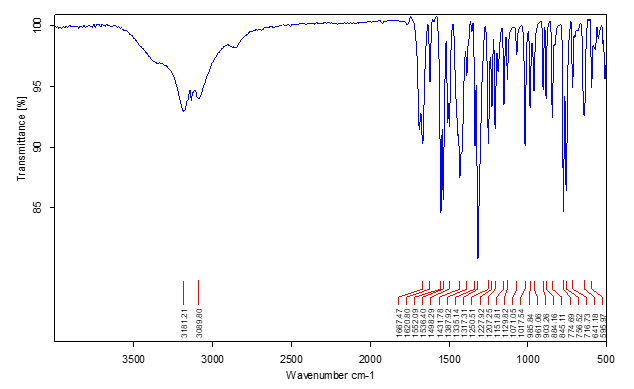


**Figure S22**. IR spectra of **3o**

**2-(fur-2-yl)-6-nitro-1,2,4-triazolo[1,5-*a*]pyrimidin-7-one morpholinic salt (3p)**

**DMSO**

**H2O**

**DMSO**

**Figure S23**. 1H NMR (400 MHz, DMSO-*d*6) and 13C NMR (100 MHz, DMSO-*d*6) spectra of **3p**

**2-(fur-2-yl)-6-nitro-1,2,4-triazolo[1,5-*a*]pyrimidin-7-one morpholinic salt (3p)**


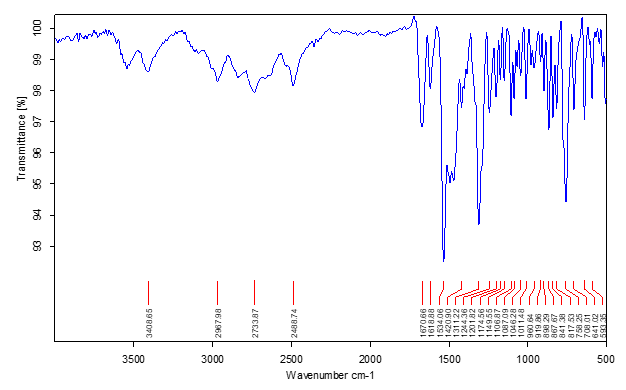


**Figure S24**. IR spectra of **3p**

**2-(fur-2-yl)-6-nitro-1,2,4-triazolo[1,5-*a*]pyrimidin-7-one *L*-argininium salt (3q)**

**DMSO**

**DMSO**

**Figure S25**. 1H NMR (400 MHz, DMSO-*d*6) and 13C NMR (100 MHz, DMSO-*d*6) spectra of **3q**

**2-(fur-2-yl)-6-nitro-1,2,4-triazolo[1,5-*a*]pyrimidin-7-one *L*-argininium salt (3q)**

**Figure S26**. IR spectra of **3q**

**3-(4-Hydroxyphenylethyl)-[1,3,4]thiadiazolo[3,2-*a*]purin-8-one (6a)**

**DMSO**

**DMSO**

**Figure S27**. 1H NMR (400 MHz, DMSO-*d*6) and 13C NMR (100 MHz, DMSO-*d*6) spectra of **6b**

**3-(4-Hydroxyphenylethyl)-[1,3,4]thiadiazolo[3,2-*a*]purin-8-one (6a)**

**Figure S28**. IR spectra of **6a**

**3-(Cyclopropyl)-[1,3,4]thiadiazolo[3,2-*a*]purin-8-one (6b)**

**H2O**

**DMSO**

**DMSO**

**Figure S29**. 1H NMR (400 MHz, DMSO-*d*6) and 13C NMR (100 MHz, DMSO-*d*6) spectra of **6b**

**3-(Cyclopropyl)-[1,3,4]thiadiazolo[3,2-*a*]purin-8-one (6b)**

**Figure S30**. IR spectra of **6b**

**5-[4-(diethoxymethyloxy)butyl]thiadiazolo[3,2-*a*]purin-8-one (6c)**

**H2O**

**DMSO**


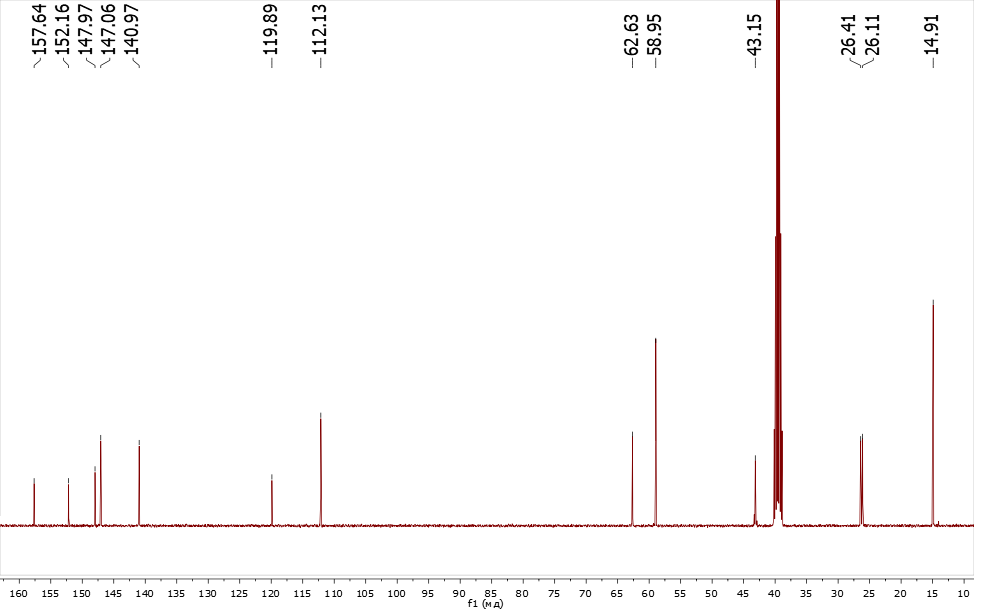


**DMSO**

**Figure S31**. 1H NMR (400 MHz, DMSO-*d*6) and 13C NMR (100 MHz, DMSO-*d*6) spectra of **6c**

**5-[4-(diethoxymethyloxy)butyl]thiadiazolo[3,2-*a*]purin-8-one (6c)**


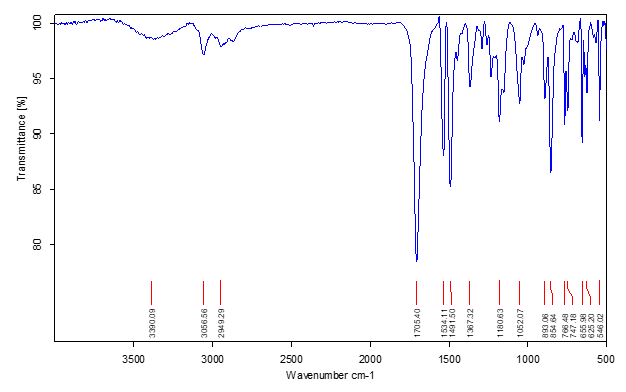


**Figure S32**. IR spectra of **6c**

**3-nitrobenz[4,5]imidazo[1,2-*a*]pyrimidin-4(1*H*)-one sodium salt (9)**

**H2O**

**DMSO**

**DMSO**

**Figure S33**. 1H NMR (400 MHz, DMSO-*d*6) and 13C NMR (100 MHz, DMSO-*d*6) spectra of **9**

**3-nitrobenz[4,5]imidazo[1,2-*a*]pyrimidin-4(1*H*)-one sodium salt (9)**

**Figure S34**. IR spectra of **9**

**2-(*p*-Tolyl)-4-(2,3,4-trimethoxyphenyl)-2*H*-benz[4,5]imidazo[1,2-*a*][1,2,3]triazolo[4,5-*e*]pyrimidine (13a)**

**H2O**

**CHCl3**

**CHCl3**

**Figure S35**. 1H NMR (400 MHz, DMSO-*d*6) and 13C NMR (100 MHz, CDCl3) spectra of **13a2-(*p*-Tolyl)-4-(2,3,4-trimethoxyphenyl)-2*H*-benz[4,5]imidazo[1,2-*a*][1,2,3]triazolo[4,5-*e*]pyrimidine (13a)**

**Figure S36**. IR spectra of **13a**

**2-(*p*-Tolyl)-4-(3,4-trimethoxyphenyl)-2*H*-benz[4,5]imidazo[1,2-*a*][1,2,3]triazolo[4,5-*e*]pyrimidine (13b)**

**H2O**

**CHCl3**

**Figure S37**. 1H NMR (400 MHz, DMSO-*d*6) and 13C NMR (100 MHz, CDCl3) spectra of **13b**

**CHCl3**

**2-(*p*-Tolyl)-4-(3,4-trimethoxyphenyl)-2*H*-benz[4,5]imidazo[1,2-*a*][1,2,3]triazolo[4,5-*e*]pyrimidine (13b)**

**Figure S38**. IR spectra of **13b**

**2-(*p*-Tolyl)-4-(thien-2-yl)-2*H*-benz[4,5]imidazo[1,2-*a*][1,2,3]triazolo[4,5-*e*]pyrimidine (13c)**

**CHCl3**

**H2O**

**Figure S39**. 1H NMR (400 MHz, DMSO-*d*6) and 13C NMR (100 MHz, CDCl3) spectra of **13c**

**CHCl3**

**2-(*p*-Tolyl)-4-(thien-2-yl)-2*H*-benz[4,5]imidazo[1,2-*a*][1,2,3]triazolo[4,5-*e*]pyrimidine (13c)**

**Figure S40**. IR spectra of **13c**

**2-(*p*-Tolyl)-4-(1-Methyl-1*H*-pyrrol-2-yl)-2*H*-benz[4,5]imidazo[1,2-*a*][1,2,3]triazolo[4,5-*e*]pyrimidine (13d)**

**CHCl3**

**H2O**

**CHCl3**

**Figure S41**. 1H NMR (400 MHz, DMSO-*d*6) and 13C NMR (100 MHz, CDCl3) spectra of **13d**

**2-(*p*-Tolyl)-4-(1-Methyl-1*H*-pyrrol-2-yl)-2*H*-benz[4,5]imidazo[1,2-*a*][1,2,3]triazolo[4,5-*e*]pyrimidine (13d)**

**Figure S42**. IR spectra of **13c**

**2-(*p*-Tolyl)-4-(1-naphthalene-2-ol)-2*H*-benz[4,5]imidazo[1,2-*a*][1,2,3]triazolo[4,5-*e*]pyrimidine (13e)**

**Figure S43**. 1H NMR (400 MHz, DMSO-*d*6) and 13C NMR (100 MHz, CDCl3) spectra of **13d**

**CHCl3**

**CHCl3**

**H2O**

**2-(*p*-Tolyl)-4-(1-naphthalene-2-ol)-2*H*-benz[4,5]imidazo[1,2-*a*][1,2,3]triazolo[4,5-*e*]pyrimidine (13e)**

**Figure S44**. IR spectra of **13c**

**8,9-Difluor-2-(*p*-Tolyl)-4-(2,3,4-trimethoxyphenyl)-2*H*-benz[4,5]imidazo[1,2-*a*][1,2,3]triazolo[4,5-*e*]pyrimidine (14a)**

**Figure S43**. 1H NMR (400 MHz, DMSO-*d*6) and 13C NMR (100 MHz, CDCl3) spectra of **14a8,9-Difluor-2-(*p*-Tolyl)-4-(2,3,4-trimethoxyphenyl)-2*H*-benz[4,5]imidazo[1,2-*a*][1,2,3]triazolo[4,5-*e*]pyrimidine (14a)**

**Figure S44**. IR spectra of **14a**
